# Supplementary material for: The Immunogenicity of Capsid-Like Particle Vaccines in Combination with Different Adjuvants Using Different Routes of Administration
Source: MDPI journal article supplement (doi:10.3390/vaccines9020131), 2021-02-06
Supplement: s1 [file s1]

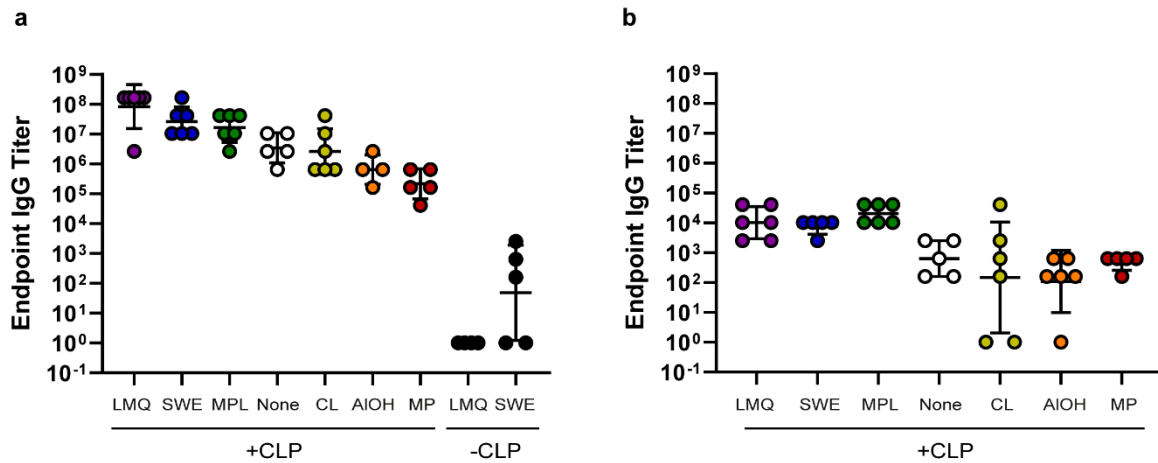

**Figure S1. Immunogenicity of antigens on CLP in extrinsic adjuvant formulations: (a) SpyCatcher and (b) HPV peptide-specific IgG titers following immunization with the SpyCatcher-AP205-L2 (+CLP) vaccine formulated in different adjuvants. Specifically, mice were immunized with liposomes/MPL/QS21 (LMQ, purple, n = 6), squalene water emulsion (SWE, blue, n = 6), monophosphoryl lipid A (MPL, green, n = 6), no adjuvants (none, white, n = 5), cationic liposomes (CL, yellow, n = 6), aluminum hydroxide (AIOH, orange, n = 4), or microparticles (MP, red, n = 5). The control groups are equimolar soluble SpyCatcher proteins formulated in either LMQ or SWE (-CLP, black, n = 6 for both groups). Each circle represents the titer obtained in a single mouse in one representative ELISA assay measurement at an O.D. 450 nm cutoff of 0.1. The geometric mean is shown together with the geometric standard deviation.**

**a**

| IgG ELISA (SpyCatcher) | LMQ    | SWE    | MPL    | No adjuvant | CL     | AIOH  | Microparticles | LMQ control | SWE control |
|------------------------|--------|--------|--------|-------------|--------|-------|----------------|-------------|-------------|
| LMQ                    |        |        |        |             |        |       |                |             |             |
| SWE                    | 0.11   |        |        |             |        |       |                |             |             |
| MPL                    | 0.048* | 0.73   |        |             |        |       |                |             |             |
| No adjuvant            | 0.01*  | 0.04*  | 0.07   |             |        |       |                |             |             |
| CL                     | 0.009* | 0.048  | 0.10   | 0.68        |        |       |                |             |             |
| AIOH                   | 0.03*  | 0.005* | 0.02*  | 0.10        | 0.28   |       |                |             |             |
| Microparticles         | 0.004* | 0.002* | 0.004* | 0.02*       | 0.04*  | 0.29  |                |             |             |
| LMQ control            | 0.005* | 0.005* | 0.005* | 0.016*      | 0.005* | 0.03* | 0.016*         |             |             |
| SWE control            | 0.005* | 0.002* | 0.004* | 0.008*      | 0.002* | 0.02* | 0.008*         | 0.17        |             |

Kruskal-Wallis test P<0.0001

**b**

| IgG ELISA (I2) | LMQ    | SWE    | MPL    | No adjuvant | CL   | AIOH | Microparticles |
|----------------|--------|--------|--------|-------------|------|------|----------------|
| LMQ            |        |        |        |             |      |      |                |
| SWE            | 0.96   |        |        |             |      |      |                |
| MPL            | 0.45   | 0.12   |        |             |      |      |                |
| No adjuvant    | 0.03*  | 0.02*  | 0.002* |             |      |      |                |
| CL             | 0.06   | 0.08   | 0.03*  | 0.73        |      |      |                |
| AIOH           | 0.002* | 0.002* | 0.002* | 0.21        | 0.8  |      |                |
| Microparticles | 0.002* | 0.008* | 0.002* | >0.99       | 0.77 | 0.21 |                |

Kruskal-Wallis test P=0.0003

**c**

| IgG1 ELISA (SpyCatcher) | LMQ    | SWE    | MPL    | No adjuvant | CL     | AIOH | Microparticles |
|-------------------------|--------|--------|--------|-------------|--------|------|----------------|
| LMQ                     |        |        |        |             |        |      |                |
| SWE                     | 0.13   |        |        |             |        |      |                |
| MPL                     | 0.59   | 0.04*  |        |             |        |      |                |
| No adjuvant             | >0.99  | 0.26   | 0.55   |             |        |      |                |
| CL                      | 0.92   | 0.09   | 0.49   | 0.71        |        |      |                |
| AIOH                    | 0.004* | 0.002* | 0.009* | 0.024*      | 0.002* |      |                |
| Microparticles          | 0.1    | 0.02*  | 0.1    | 0.1         | 0.02*  | 0.71 |                |

Kruskal-Wallis test P=0.0016

**d**

| IgG2a ELISA (SpyCatcher) | LMQ    | SWE    | MPL    | No adjuvant | CL    | AIOH | Microparticles |
|--------------------------|--------|--------|--------|-------------|-------|------|----------------|
| LMQ                      |        |        |        |             |       |      |                |
| SWE                      | 0.70   |        |        |             |       |      |                |
| MPL                      | 0.04*  | 0.09   |        |             |       |      |                |
| No adjuvant              | 0.26   | 0.26   | >0.99  |             |       |      |                |
| CL                       | 0.06   | 0.06   | 0.70   | >0.99       |       |      |                |
| AIOH                     | 0.002* | 0.002* | 0.009* | 0.10        | 0.03* |      |                |
| Microparticles           | 0.38   | 0.55   | 0.55   | >0.99       | 0.90  | 0.26 |                |

Kruskal-Wallis test P=0.0085

**e**

| IgG2b ELISA (SpyCatcher) | LMQ    | SWE  | MPL   | No adjuvant | CL   | AIOH | Microparticles |
|--------------------------|--------|------|-------|-------------|------|------|----------------|
| LMQ                      |        |      |       |             |      |      |                |
| SWE                      | 0.03*  |      |       |             |      |      |                |
| MPL                      | 0.24   | 0.18 |       |             |      |      |                |
| No adjuvant              | 0.17   | 0.91 | 0.55  |             |      |      |                |
| CL                       | 0.03*  | 0.49 | 0.09  | 0.55        |      |      |                |
| AIOH                     | 0.004* | 0.13 | 0.03* | 0.26        | 0.59 |      |                |
| Microparticles           | 0.26   | 0.55 | 0.55  | 0.70        | 0.90 | 0.90 |                |

Kruskal-Wallis test P=0.0380

**f**

| IgG3 ELISA (SpyCatcher) | LMQ    | SWE   | MPL  | No adjuvant | CL   | AIOH  | Microparticles |
|-------------------------|--------|-------|------|-------------|------|-------|----------------|
| LMQ                     |        |       |      |             |      |       |                |
| SWE                     | 0.03*  |       |      |             |      |       |                |
| MPL                     | 0.31   | 0.40  |      |             |      |       |                |
| No adjuvant             | 0.10   | 0.90  | 0.26 |             |      |       |                |
| CL                      | 0.004* | 0.02* | 0.06 | 0.10        |      |       |                |
| AIOH                    | 0.009* | 0.18  | 0.08 | 0.39        | 0.93 |       |                |
| Microparticles          | 0.03*  | 0.02* | 0.17 | 0.10        | 0.90 | >0.99 |                |

Kruskal-Wallis test P=0.0052

**g**

| IgG ELISA (SpyCatcher) Route of immunization | IM     | ID     | SC    | IP   | IN |
|----------------------------------------------|--------|--------|-------|------|----|
| IM                                           |        |        |       |      |    |
| ID                                           | 0.10   |        |       |      |    |
| SC                                           | 0.01*  | 0.21   |       |      |    |
| IP                                           | 0.007* | 0.1    | 0.77  |      |    |
| IN                                           | 0.002* | 0.007* | 0.01* | 0.06 |    |

Kruskal-Wallis test P=0.0005

**h**

| IgG ELISA (I2) Route of immunization | IM    | ID    | SC    | IP   | IN |
|--------------------------------------|-------|-------|-------|------|----|
| IM                                   |       |       |       |      |    |
| ID                                   | 0.03* |       |       |      |    |
| SC                                   | 0.05  | 0.92  |       |      |    |
| IP                                   | 0.18  | 0.47  | 0.71  |      |    |
| IN                                   | 0.02* | >0.99 | >0.99 | 0.71 |    |

Kruskal-Wallis test P=0.0005

**Figure S2. Statistical comparisons:** Mann–Whitney nonparametric tests were used for all tests of significance included in this paper. Statistic differences are highlighted with an asterisk (\*).

- a- Anti-SpyCatcher IgG ELISA (corresponding to Figure 2a).
- b- Anti HPV IgG ELISA (corresponding to Figure 2b).
- c- Relative IgG1 titers (corresponding to Figure 3a).
- d- Relative IgG2a titers (corresponding to Figure 3b).
- e- Relative IgG2b titers (corresponding to Figure 3c).
- f- Relative IgG3 titers (corresponding to Figure 3d).
- g- Anti-Spycatcher IgG titers following different immunization routes (corresponding to Figure 4a).
- h- Anti-HPV IgG titers following different immunization routes (corresponding to Figure 4b).

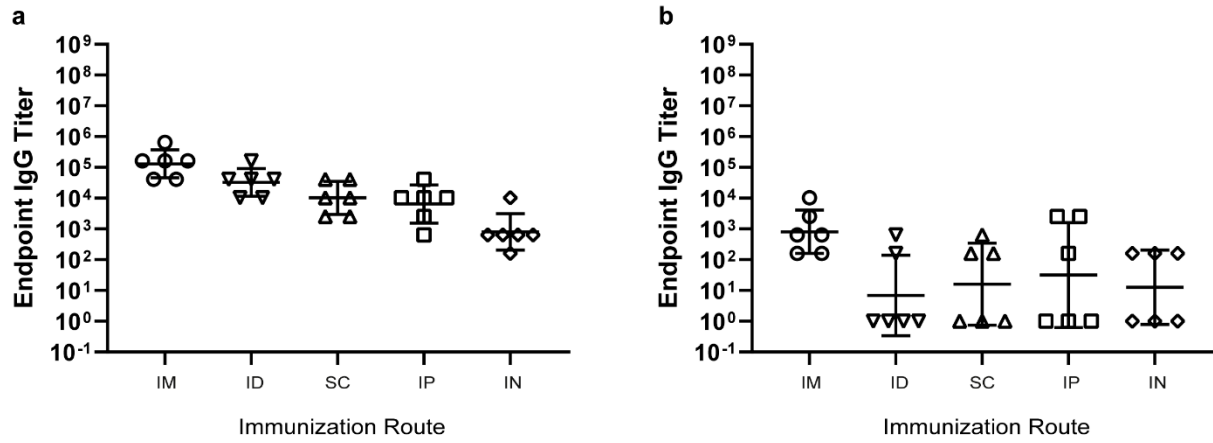

**Figure S3. Route of Immunization:** the characterization of immunogenicity following administration of the CLP vaccine via different routes of immunization. **(a)** SpyCatcher and **(b)** HPV peptide-specific endpoint IgG titers were established at an O.D. 450 nm cutoff of 0.1. All mice ( $n = 6$  per immunization route) received unadjuvanted SpyCatcher-AP205-L2. The immunization routes were intramuscular (IM), intradermal (ID), subcutaneous (SC), intraperitoneal (IP), and intranasal (IN). The geometric mean is shown together with geometric standard deviation.
